# Supplementary material
Source: PubMed Central journal article supplement (PMC4277929)
Supplement: NIHMS619491-supplement-01.pdf [file NIHMS619491-supplement-01.pdf]

## Elevated Risk for Autoimmune Disorders in Iraq and Afghanistan Veterans with Posttraumatic Stress Disorder

### *Supplemental Information*

**Table S1.** Stratified sample characteristics for males and females

| Characteristic              | Women             |                                               |                                                   |                      |                | Men               |                                            |                                                  |                      |                |
|-----------------------------|-------------------|-----------------------------------------------|---------------------------------------------------|----------------------|----------------|-------------------|--------------------------------------------|--------------------------------------------------|----------------------|----------------|
|                             | Total<br><i>n</i> | No<br>Psychiatric<br>Disorder<br><i>n</i> (%) | Other<br>Psychiatric<br>Disorders<br><i>n</i> (%) | PTSD<br><i>n</i> (%) | <i>p</i> value | Total<br><i>n</i> | No Psychiatric<br>Disorder<br><i>n</i> (%) | Other<br>Psychiatric<br>Disorder<br><i>n</i> (%) | PTSD<br><i>n</i> (%) | <i>p</i> value |
| Characteristic              | 79,365            | 40,141 (50.6)                                 | 19,310 (24.3)                                     | 19,905 (25.1)        | <.001          | 586,913           | 292,658 (49.9)                             | 110,394 (18.8)                                   | 183,861 (31.3)       | <.001          |
| Age: Mean (SD) <sup>a</sup> | 30.2 (8.2)        | 30.5 (8.4)                                    | 29.7 (7.9)                                        | 30.1 (8.1)           | <.001          | 31.4 (8.7)        | 32.4 (9.0)                                 | 31.0 (8.6)                                       | 29.9 (8.0)           | <.001          |
| Age Group <sup>a</sup>      |                   |                                               |                                                   |                      |                |                   |                                            |                                                  |                      |                |
| 18-24                       | 23,699            | 11,616 (28.9)                                 | 5,999 (31.1)                                      | 6,084 (30.6)         | <.001          | 163,037           | 72,460 (24.8)                              | 31,848 (28.8)                                    | 58,729 (31.9)        | <.001          |
| 25-34                       | 34,682            | 17,370 (43.3)                                 | 8,704 (45.1)                                      | 8,608 (43.2)         | <.001          | 229,061           | 106,916 (36.5)                             | 44,649 (40.4)                                    | 77,496 (42.1)        | <.001          |
| 35-44                       | 14,550            | 7,584 (18.9)                                  | 3,237 (16.8)                                      | 3,729 (18.7)         | <.001          | 134,554           | 76,472 (26.1)                              | 23,265 (21.1)                                    | 34,817 (18.9)        | <.001          |
| 45-54                       | 6,425             | 3,571 (8.9)                                   | 1,370 (7.1)                                       | 1,484 (7.5)          | <.001          | 60,261            | 36,810 (12.6)                              | 10,632 (9.6)                                     | 12,819 (7.0)         | <.001          |
| Race/Ethnicity              |                   |                                               |                                                   |                      |                |                   |                                            |                                                  |                      |                |
| White                       | 30,955            | 15,346 (38.2)                                 | 7,774 (40.3)                                      | 7,835 (39.4)         | <.001          | 295,146           | 143,003 (48.9)                             | 57,167 (51.8)                                    | 94,976 (51.7)        | <.001          |
| Non-White                   | 48,401            | 24,795 (61.8)                                 | 11,536 (59.7)                                     | 12,070 (60.6)        | <.001          | 291,767           | 149,655 (51.1)                             | 53,227 (48.2)                                    | 88,885 (48.3)        | <.001          |
| Marital Status              |                   |                                               |                                                   |                      |                |                   |                                            |                                                  |                      |                |
| Married                     | 26,901            | 13,682 (34.1)                                 | 6,262 (32.5)                                      | 6,957 (35.0)         | <.001          | 266,874           | 139,800 (47.8)                             | 46,619 (42.3)                                    | 80,455 (43.8)        | <.001          |
| Never Married               | 45,434            | 23,214 (57.9)                                 | 11,334 (58.8)                                     | 10,886 (54.8)        | <.001          | 296,434           | 141,384 (48.3)                             | 59,149 (53.6)                                    | 95,901 (52.2)        | <.001          |
| Divorced/Widowed/Other      | 6,942             | 3,213 (8.0)                                   | 1,689 (8.8)                                       | 2,040 (10.3)         | <.001          | 23,269            | 11,281 (3.9)                               | 4,560 (4.1)                                      | 7,428 (4.0)          | <.001          |
| Military Rank               |                   |                                               |                                                   |                      |                |                   |                                            |                                                  |                      |                |
| Enlisted                    | 71,729            | 35,086 (87.4)                                 | 17,969 (93.1)                                     | 18,674 (93.8)        | <.001          | 538,917           | 257,523 (88.0)                             | 104,087 (94.3)                                   | 177,307 (96.4)       | <.001          |
| Other                       | 7,627             | 5,055 (12.6)                                  | 1,341 (6.9)                                       | 1,231 (6.2)          | <.001          | 47,996            | 35,135 (12.0)                              | 6,307 (5.7)                                      | 6,554 (3.6)          | <.001          |
| Active Duty or Reserve      |                   |                                               |                                                   |                      |                |                   |                                            |                                                  |                      |                |
| Active Duty                 | 45,095            | 23,139 (57.6)                                 | 11,112 (57.5)                                     | 10,844 (54.5)        | <.001          | 326,247           | 160,904 (55.0)                             | 59,253 (53.7)                                    | 106,090 (57.7)       | <.001          |
| Reserve/National Guard      | 34,261            | 17,002 (49.6)                                 | 8,198 (42.5)                                      | 9,061 (45.5)         | <.001          | 260,666           | 131,754 (45.0)                             | 51,141 (46.3)                                    | 77,771 (42.3)        | <.001          |

|                                              | Women             |                                               |                                                   |                      |                | Men               |                                            |                                                  |                      |                |
|----------------------------------------------|-------------------|-----------------------------------------------|---------------------------------------------------|----------------------|----------------|-------------------|--------------------------------------------|--------------------------------------------------|----------------------|----------------|
|                                              | Total<br><i>n</i> | No<br>Psychiatric<br>Disorder<br><i>n</i> (%) | Other<br>Psychiatric<br>Disorders<br><i>n</i> (%) | PTSD<br><i>n</i> (%) | <i>p</i> value | Total<br><i>n</i> | No Psychiatric<br>Disorder<br><i>n</i> (%) | Other<br>Psychiatric<br>Disorder<br><i>n</i> (%) | PTSD<br><i>n</i> (%) | <i>p</i> value |
| Military Branch                              |                   |                                               |                                                   |                      |                |                   |                                            |                                                  |                      |                |
| Army                                         | 49,135            | 22,527 (56.1)                                 | 11,617 (60.2)                                     | 14,991 (75.3)        | <.001          | 358,735           | 159,660 (54.6)                             | 66,549 (60.3)                                    | 132,526 (72.1)       | <.001          |
| Air Force                                    | 14,104            | 8,763 (21.8)                                  | 3,307 (17.1)                                      | 2,034 (10.2)         | <.001          | 65,080            | 46,424 (15.9)                              | 11,182 (10.1)                                    | 7,474 (4.1)          | <.001          |
| Marines                                      | 3,184             | 1,571 (3.9)                                   | 748 (3.9)                                         | 865 (4.3)            | <.001          | 88,744            | 40,175 (13.7)                              | 15,233 (13.8)                                    | 33,336 (18.1)        | <.001          |
| Navy                                         | 12,933            | 7,280 (18.1)                                  | 3,638 (18.8)                                      | 2,015 (10.1)         | <.001          | 74,354            | 46,399 (15.9)                              | 17,430 (15.8)                                    | 10,525 (5.7)         | <.001          |
| Multiple Deployments                         | 25,704            | 13,158 (32.8)                                 | 5,898 (30.6)                                      | 6,648 (33.4)         | <.001          | 240,129           | 119,397 (40.8)                             | 42,344 (38.4)                                    | 78,388 (42.7)        | <.001          |
| Urban                                        | 47,788            | 23,457 (67.1)                                 | 11,958 (67.1)                                     | 12,373 (66.2)        | <.001          | 322,358           | 156,980 (61.3)                             | 63,068 (62.1)                                    | 102,310 (59.3)       | <.001          |
| Primary Care Visits: M (SD) <sup>b</sup>     | 2.0 (2.3)         | 1.4 (1.7)                                     | 2.5 (2.3)                                         | 2.9 (2.8)            | <.001          | 1.6 (1.9)         | 1.1 (1.3)                                  | 1.9 (2.2)                                        | 2.2 (2.4)            | <.001          |
| Mental Health Visits: M (SD) <sup>b</sup>    | 2.3 (8.3)         | 0.1 (0.7)                                     | 2.3 (6.0)                                         | 6.9 (14.5)           | <.001          | 2.6 (9.6)         | 0.1 (0.5)                                  | 2.4 (7.9)                                        | 6.6 (15.1)           | <.001          |
| Military Sexual Trauma <sup>c</sup>          | 10,481            | 1,257 (3.1)                                   | 2,537 (13.1)                                      | 6,687 (33.6)         | <.001          | 3,169             | 291 (0.1)                                  | 650 (0.6)                                        | 2,228 (1.2)          | <.001          |
| Psychiatric Diagnoses                        |                   |                                               |                                                   |                      |                |                   |                                            |                                                  |                      |                |
| PTSD                                         | 19,905            |                                               |                                                   | 19,905 (100.0)       | <.001          | 183,861           |                                            |                                                  | 183,861 (100.0)      | <.001          |
| Depression                                   | 26,851            |                                               | 11,848 (61.4)                                     | 15,003 (75.4)        | <.001          | 157,258           |                                            | 45,465 (41.2)                                    | 111,793 (60.8)       | <.001          |
| Anxiety Disorder                             | 17,149            |                                               | 7,797 (40.4)                                      | 9,352 (47.0)         | <.001          | 106,670           |                                            | 36,835 (33.4)                                    | 69,835 (38.0)        | <.001          |
| Adjustment Disorder                          | 13,674            |                                               | 7,109 (36.8)                                      | 6,565 (33.0)         | <.001          | 96,952            |                                            | 40,407 (36.6)                                    | 56,545 (30.8)        | <.001          |
| Psychosis                                    | 946               |                                               | 292 (1.5)                                         | 654 (3.3)            | <.001          | 8,624             |                                            | 2,085 (1.9)                                      | 6,539 (3.6)          | <.001          |
| Alcohol Use Disorder                         | 5,234             |                                               | 1,715 (8.9)                                       | 3,519 (17.7)         | <.001          | 80,848            |                                            | 24,198 (21.9)                                    | 56,650 (30.8)        | <.001          |
| Substance Use Disorder                       | 2,678             |                                               | 811 (4.2)                                         | 1,867 (9.4)          | <.001          | 38,692            |                                            | 9,571 (8.7)                                      | 29,121 (15.8)        | <.001          |
| Comorbid Psychiatric Dx: M (SD) <sup>d</sup> | 1.7 (1.0)         |                                               | 1.5 (0.9)                                         | 1.9 (2.0)            | <.001          | 1.7 (1.2)         |                                            | 1.4 (1.0)                                        | 1.8 (1.3)            | <.001          |

Dxs, disorders; M, mean; *n*, number of participants; PTSD, posttraumatic stress disorder; SD, standard deviation.

<sup>a</sup> Age refers to age at initial VA appointment.

<sup>b</sup> Visits refer to mean annual number of primary care or mental health visits.

<sup>c</sup> Military sexual trauma exposure is based on VA clinical encounters coded for military sexual trauma.

<sup>d</sup> Refers to number of psychiatric diagnoses excluding PTSD. Total column reflects either 39,215 women or 294,255 men with one or more psychiatric diagnosis.

**Table S2.** *International Classification of Diseases, Ninth Revision Clinical Modification (ICD-9-CM) codes used to identify and categorize targeted autoimmune disorders*

| <b>Autoimmune Disorder</b>  | <b>ICD-9-CM Subgroup</b>     | <b>ICD-9-CM Codes</b>                 |
|-----------------------------|------------------------------|---------------------------------------|
| Thyroiditis (aggregate)     | Graves                       | 2420.0, .1                            |
|                             | Hypothyroidism               | 244.8, .9                             |
|                             | Thyroiditis                  | 245.0, .1, .2, .3,                    |
| Inflammatory Bowel Diseases | Crohn's Disease              | 555.0, .1, .2, .9                     |
|                             | Ulcerative Colitis           | 556.0, .1, .2, .3, .4, .5, .6, .8, .9 |
| Multiple Sclerosis          | Multiple Sclerosis           | 340                                   |
| Rheumatoid Arthritis        | Rheumatoid Arthritis         | 714.0, .1, .2, .4, .81                |
| Lupus Erythematosus         | Lupus Erythematosus          | 695.4                                 |
|                             | Systemic Lupus Erythematosus | 710.0                                 |
